# Supplementary material for: Independent and Joint Associations between Serum Calcium, 25-Hydroxy Vitamin D, and the Risk of Primary Liver Cancer: A Prospective Nested Case–Control Study
Source: Oxford University Press journal article supplement (doi:10.1158/1055-9965.epi-20-0417), 2020-08-20
Supplement: 10559965epi200417-sup-239458_2_supp_6462164_qs9qq3.docx [file 10559965epi200417-sup-239458_2_supp_6462164_qs9qq3.docx]

Supplementary Table S1. Independent associations of baseline serum calcium and serum 25(OH) vitamin D levels (by quartiles) with primary liver cancer risk

|  | Model 1  OR (95%CI)a | Model 2  OR (95%CI)b | Model 3  OR (95%CI)c | Model 4  OR (95%CI)d |
| --- | --- | --- | --- | --- |
| Calcium, mmol/L |  |  |  |  |
| Q1 (< 1.03) | 1.48 (0.98-2.25) | 1.40 (0.91-2.15) | 1.49 (0.98-2.26) | 1.38 (0.89-2.14) |
| Q2 (1.03~1.49) | 1.00 (reference) | 1.00 (reference) | 1.00 (reference) | 1.00 (reference) |
| Q3 (1.49~2.23) | 0.93 (0.59-1.46) | 0.96 (0.60-1.53) | 0.92 (0.59-1.47) | 0.97 (0.61-1.55) |
| Q4 (≥ 2.23) | 1.80 (1.20-2.69) | 1.88 (1.24-2.85) | 1.84 (1.23-2.76) | 1.93 (1.27-2.93) |
| 25(OH) vitamin D, nmol/l |  |  |  |  |
| Q1 (< 13.43) | 0.86 (0.54-1.23) | 0.83 (0.54-1.26) | 0.77 (0.51-1.16) | 0.78 (0.51-1.20) |
| Q2 (13.43~20.85) | 1.00 (reference) | 1.00 (reference) | 1.00 (reference) | 1.00 (reference) |
| Q3 (20.85~33.22) | 1.10 (0.75-1.61) | 1.05 (0.71-1.56) | 1.09 (0.74-1.60) | 1.02 (0.68-1.52) |
| Q4 (≥ 33.22) | 0.69 (0.45-1.05) | 0.64 (0.41-0.99) | 0.67 (0.44-1.03) | 0.62 (0.40-0.97) |

aModel 1: Crude.
bModel 2: Adjusted for age, gender, BMI, smoking, drinking, trial, HBsAg, anti-HBc, and anti-HCV.

cModel 3: For the analysis of serum calcium, adjusted for serum 25(OH) vitamin D; for the analysis of serum 25(OH) vitamin D, adjusted for serum calcium.

dModel 4: For the analysis of serum calcium, adjusted for serum 25(OH) vitamin D, age, gender, BMI, smoking, drinking, trial, HBsAg, anti-HBc and anti-HCV; for the analysis of serum 25(OH) vitamin D, adjusted for serum calcium, age, gender, BMI, smoking, drinking, trial, HBsAg, anti-HBc and anti-HCV.
