# Supplementary material for: Independent and Joint Associations between Serum Calcium, 25-Hydroxy Vitamin D, and the Risk of Primary Liver Cancer: A Prospective Nested Case–Control Study
Source: Oxford University Press journal article supplement (doi:10.1158/1055-9965.epi-20-0417), 2020-08-20
Supplement: 10559965epi200417-sup-239458_2_supp_6462168_qc9qq3.docx [file 10559965epi200417-sup-239458_2_supp_6462168_qc9qq3.docx]

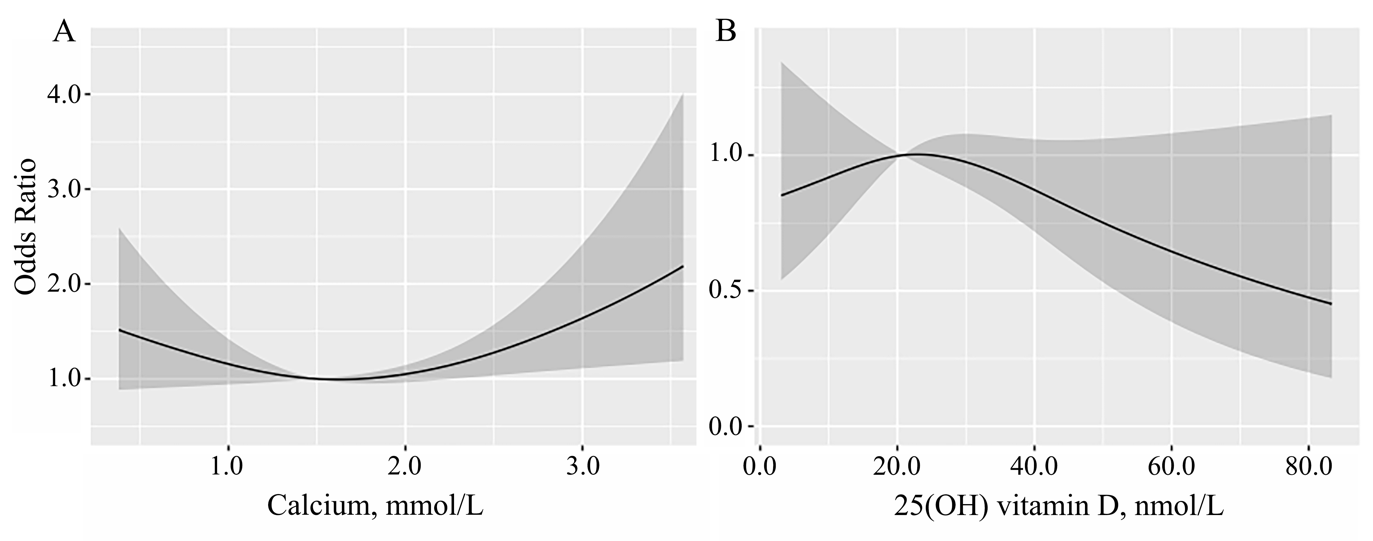


Figure S1. Cubic spline graph of the odds ratio (represented by the solid line) for the association of primary liver cancer risk with (A) calcium (B) 25(OH) vitamin D
